# Supplementary material for: Effect of Pectin/Nanochitosan-Based Coatings and Storage Temperature on Shelf-Life Extension of “Elephant” Mango (Mangifera indica L.) Fruit
Source: MDPI journal article supplement (doi:10.3390/polym13193430), 2021-10-06
Supplement: s1 [file s1]

# Supplementary Materials: Effect of Pectin/Nanochitosan-Based Coatings and Storage Temperature on Shelf-life Extension of “Elephant” Mango (*Mangifera Indica* L.) Fruit

Thi Minh Phuong Ngo, Thanh Hoi Nguyen, Thi Mong Quyen Dang, Thi Van Thanh Do, Alissara Reungsang, Nareekan Chaiwong and Pornchai Rachtanapun

## 1. Effect of coating on shelf life and some quality traits of mango fruits

**Table S1.** Effect of coating on the weight loss of mango fruits.

| Storage time (day) | Weight loss (%) |                        |                         |                         |                         |                         |
|--------------------|-----------------|------------------------|-------------------------|-------------------------|-------------------------|-------------------------|
|                    | 0               | 3                      | 6                       | 9                       | 12                      | 15                      |
| Uncoated           | 0               | 6.9 <sup>e</sup> ± 0.8 | 16.4 <sup>e</sup> ± 1.2 | 21.8 <sup>e</sup> ± 1.3 |                         |                         |
| 0.75%NaCS          | 0               | 5.6 <sup>d</sup> ± 0.3 | 8.9 <sup>d</sup> ± 0.4  | 12.9 <sup>d</sup> ± 0.5 | 16.5 <sup>e</sup> ± 0.7 |                         |
| 1%NaCS             | 0               | 4.5 <sup>c</sup> ± 0.2 | 7.2 <sup>c</sup> ± 0.3  | 10.2 <sup>c</sup> ± 0.4 | 13.8 <sup>d</sup> ± 0.5 |                         |
| 1.25%NaCS          | 0               | 3.3 <sup>a</sup> ± 0.2 | 6.0 <sup>b</sup> ± 0.3  | 9.0 <sup>b</sup> ± 0.4  | 12.8 <sup>c</sup> ± 0.5 | 15.8 <sup>b</sup> ± 0.8 |
| 1.5%P/NaCS         | 0               | 3.2 <sup>a</sup> ± 0.1 | 6.3 <sup>b</sup> ± 0.2  | 9.3 <sup>bc</sup> ± 0.5 | 12.2 <sup>c</sup> ± 0.6 |                         |
| 2%P/NaCS           | 0               | 2.2 <sup>a</sup> ± 0.2 | 4.1 <sup>a</sup> ± 0.1  | 7.1 <sup>a</sup> ± 0.3  | 9.6 <sup>b</sup> ± 0.4  | 12.5 <sup>a</sup> ± 0.9 |
| 2.5%P/NaCS         | 0               | 2.2 <sup>a</sup> ± 0.2 | 4.4 <sup>a</sup> ± 0.3  | 6.4 <sup>a</sup> ± 0.2  | 8.5 <sup>a</sup> ± 0.2  | 11.2 <sup>a</sup> ± 0.6 |

Note: Different lowercase letters (a, b, c) indicate significant differences between storage time (day) in the same columns ( $p \leq 0.05$ ).

**Table S2.** Effect of coating on firmness of mango fruits.

| Storage time (day) | Firmness (N)             |                           |                          |                          |                          |                         |
|--------------------|--------------------------|---------------------------|--------------------------|--------------------------|--------------------------|-------------------------|
|                    | 0                        | 3                         | 6                        | 9                        | 12                       | 15                      |
| Uncoated           | 31.2 <sup>aD</sup> ± 1.5 | 14.2 <sup>aC</sup> ± 1.3  | 4.4 <sup>aB</sup> ± 0.9  | 0.9 <sup>aA</sup> ± 0.2  |                          |                         |
| 0.75%NaCS          | 30.4 <sup>aE</sup> ± 1.3 | 18.6 <sup>bD</sup> ± 1.2  | 10.6 <sup>bC</sup> ± 0.9 | 5.3 <sup>bB</sup> ± 0.4  | 0.5 <sup>aA</sup> ± 0.2  |                         |
| 1%NaCS             | 31.8 <sup>aE</sup> ± 1.5 | 20.6 <sup>bcD</sup> ± 1.4 | 14.5 <sup>cC</sup> ± 1.1 | 7.6 <sup>cB</sup> ± 0.9  | 1.4 <sup>aA</sup> ± 0.5  |                         |
| 1.25%NaCS          | 31.2 <sup>aF</sup> ± 1.6 | 23.1 <sup>dE</sup> ± 1.3  | 19.5 <sup>dD</sup> ± 1.2 | 15.3 <sup>dC</sup> ± 1.0 | 6.8 <sup>bb</sup> ± 0.8  | 3.5 <sup>bA</sup> ± 0.4 |
| 1.5%P/NaCS         | 30.4 <sup>aE</sup> ± 1.3 | 22.5 <sup>cdD</sup> ± 1.2 | 16.5 <sup>cC</sup> ± 1.3 | 6.4 <sup>bcB</sup> ± 0.9 | 1.3 <sup>aA</sup> ± 0.1  |                         |
| 2%P/NaCS           | 31.8 <sup>aF</sup> ± 1.5 | 23.6 <sup>deE</sup> ± 1.7 | 18.7 <sup>dD</sup> ± 1.1 | 15.4 <sup>dC</sup> ± 0.7 | 7.5 <sup>bb</sup> ± 0.4  | 0.9 <sup>aA</sup> ± 0.4 |
| 2.5%P/NaCS         | 31.2 <sup>aF</sup> ± 1.6 | 25.8 <sup>eE</sup> ± 1.1  | 23.1 <sup>ed</sup> ± 1.4 | 19.9 <sup>eC</sup> ± 0.9 | 10.9 <sup>cb</sup> ± 0.6 | 7.0 <sup>cA</sup> ± 0.4 |

Note: Different lowercase letters (a, b, c) indicate significant differences between storage time (day) in the same columns ( $p \leq 0.05$ ). Different uppercase letters (A, B, C) indicate significant differences between samples in the same rows ( $p \leq 0.05$ ).

**Table S3.** Effect of coating on color ( $L^*$ ) of mango fruits.

| Storage time<br>(day) | $L^*$ of mango peel       |                           |                           |                            |                           |                          |
|-----------------------|---------------------------|---------------------------|---------------------------|----------------------------|---------------------------|--------------------------|
|                       | 0                         | 3                         | 6                         | 9                          | 12                        | 15                       |
| Uncoated              | 53.4 <sup>aB</sup> ± 3.1  | 54.8 <sup>aB</sup> ± 2.8  | 55.8 <sup>aA</sup> ± 4.1  | 72.1 <sup>eA</sup> ± 2.9   |                           |                          |
| 0.75%NaCS             | 53.4 <sup>aB</sup> ± 3.3  | 53.9 <sup>aB</sup> ± 2.9  | 55.1 <sup>aAB</sup> ± 2.8 | 64.5 <sup>dAB</sup> ± 3.1  | 68.2 <sup>cA</sup> ± 3.1  |                          |
| 1%NaCS <sup>ns</sup>  | 53.4 <sup>aA</sup> ± 2.9  | 52.6 <sup>aA</sup> ± 2.6  | 54.8 <sup>aA</sup> ± 2.8  | 59.5 <sup>cA</sup> ± 3.1   | 62.8 <sup>dA</sup> ± 3.3  |                          |
| 1.25%NaCS             | 53.4 <sup>aAB</sup> ± 2.7 | 52.9 <sup>aA</sup> ± 2.9  | 53.5 <sup>aAB</sup> ± 3.1 | 57.4 <sup>bcAB</sup> ± 3.2 | 59.9 <sup>bcB</sup> ± 3.4 | 63.4 <sup>bA</sup> ± 2.9 |
| 1.5%P/NaCS            | 53.4 <sup>aA</sup> ± 3.1  | 54.1 <sup>aAB</sup> ± 2.3 | 55.0 <sup>aB</sup> ± 2.6  | 58.7 <sup>bcAB</sup> ± 2.8 | 62.1 <sup>cAB</sup> ± 2.3 |                          |
| 2%P/NaCS              | 53.4 <sup>aA</sup> ± 3.1  | 55.2 <sup>aAB</sup> ± 2.6 | 54.2 <sup>aAB</sup> ± 2.7 | 53.5 <sup>abBC</sup> ± 2.3 | 56.7 <sup>bc</sup> ± 2.6  | 59.1 <sup>bc</sup> ± 3.0 |
| 2.5%P/NaCS            | 53.4 <sup>aB</sup> ± 3.1  | 53.1 <sup>aB</sup> ± 2.5  | 51.5 <sup>abC</sup> ± 2.6 | 50.4 <sup>aC</sup> ± 2.4   | 47.6 <sup>aB</sup> ± 2.1  | 36.4 <sup>aA</sup> ± 2.3 |

Note: Different lowercase letters (a, b, c) indicate significant differences between storage time (day) in the same columns ( $p \leq 0.05$ ). Different uppercase letters (A, B, C) indicate significant differences between samples in the same rows ( $p \leq 0.05$ ).

**Table S4.** Effect of coating on color ( $a^*$ ) of mango fruits.

| Storage time<br>(day) | $a^*$ of mango peel       |                            |                           |                           |                           |                          |
|-----------------------|---------------------------|----------------------------|---------------------------|---------------------------|---------------------------|--------------------------|
|                       | 0                         | 3                          | 6                         | 9                         | 12                        | 15                       |
| Uncoated              | -19.1 <sup>aA</sup> ± 3.1 | -17.2 <sup>aA</sup> ± 2.8  | -13.2 <sup>aA</sup> ± 4.1 | 2.3 <sup>aB</sup> ± 2.9   |                           |                          |
| 0.75%NaCS             | -19.1 <sup>aA</sup> ± 3.3 | -17.5 <sup>aA</sup> ± 2.9  | -14.1 <sup>aA</sup> ± 2.8 | -5.2 <sup>bB</sup> ± 3.1  | 2.1 <sup>bcC</sup> ± 3.1  |                          |
| 1%NaCS                | -19.1 <sup>aA</sup> ± 2.9 | -18.1 <sup>aA</sup> ± 2.6  | -15.1 <sup>aA</sup> ± 2.8 | -6.3 <sup>bc</sup> ± 3.1  | -0.1 <sup>bD</sup> ± 3.3  |                          |
| 1.25%NaCS             | -19.1 <sup>aA</sup> ± 2.7 | -18.2 <sup>aA</sup> ± 2.9  | -15.9 <sup>aA</sup> ± 3.1 | -7.4 <sup>bB</sup> ± 3.2  | -0.8 <sup>bB</sup> ± 3.4  | 1.2 <sup>bB</sup> ± 2.9  |
| 1.5%P/NaCS            | -19.1 <sup>aA</sup> ± 3.1 | -18.0 <sup>aA</sup> ± 2.3  | -14.9 <sup>aA</sup> ± 2.6 | -7.9 <sup>bB</sup> ± 2.8  | 5.7 <sup>cC</sup> ± 2.3   |                          |
| 2%P/NaCS              | -19.1 <sup>aA</sup> ± 3.1 | -18.4 <sup>aA</sup> ± 2.6  | -17.1 <sup>aA</sup> ± 2.7 | -16.2 <sup>aA</sup> ± 2.3 | -8.3 <sup>aB</sup> ± 2.6  | -6.7 <sup>aB</sup> ± 3.0 |
| 2.5%P/NaCS            | -19.1 <sup>aA</sup> ± 3.1 | -16.6 <sup>aAB</sup> ± 2.5 | -12.3 <sup>aB</sup> ± 2.6 | -3.4 <sup>bc</sup> ± 2.4  | 0.4 <sup>bcCD</sup> ± 2.1 | 2.4 <sup>bD</sup> ± 2.3  |

Note: Different lowercase letters (a, b, c) indicate significant differences between storage time (day) in the same columns ( $p \leq 0.05$ ). Different uppercase letters (A, B, C) indicate significant differences between samples in the same rows ( $p \leq 0.05$ ).

**Table S5.** Effect of coating on color ( $b^*$ ) of mango fruits.

| Storage time<br>(day) | $b^*$ of mango peel      |                            |                            |                          |                            |                           |
|-----------------------|--------------------------|----------------------------|----------------------------|--------------------------|----------------------------|---------------------------|
|                       | 0                        | 3                          | 6                          | 9                        | 12                         | 15                        |
| Uncoated              | 27.7 <sup>aA</sup> ± 3.1 | 39.7 <sup>cB</sup> ± 2.8   | 52.3 <sup>dC</sup> ± 4.1   | 33.3 <sup>aA</sup> ± 2.9 |                            |                           |
| 0.75%NaCS             | 27.7 <sup>aA</sup> ± 3.3 | 35.2 <sup>bcB</sup> ± 2.9  | 53.4 <sup>dC</sup> ± 2.8   | 62.3 <sup>dD</sup> ± 3.1 | 51.3 <sup>abC</sup> ± 3.1  |                           |
| 1%NaCS                | 27.7 <sup>aA</sup> ± 2.9 | 32.2 <sup>abA</sup> ± 2.6  | 45.5 <sup>cB</sup> ± 2.8   | 52.3 <sup>cC</sup> ± 3.1 | 48.9 <sup>abBC</sup> ± 3.3 |                           |
| 1.25%NaCS             | 27.7 <sup>aA</sup> ± 2.7 | 31.2 <sup>abAB</sup> ± 2.9 | 39.5 <sup>bABC</sup> ± 3.1 | 47.2 <sup>bc</sup> ± 3.2 | 69.5 <sup>cD</sup> ± 18.8  | 45.6 <sup>bBC</sup> ± 2.9 |
| 1.5%P/NaCS            | 27.7 <sup>aA</sup> ± 3.1 | 29.1 <sup>aAB</sup> ± 2.3  | 32.5 <sup>aAB</sup> ± 2.6  | 34.1 <sup>aB</sup> ± 2.8 | 59.0 <sup>bcC</sup> ± 2.3  |                           |
| 2%P/NaCS              | 27.7 <sup>aA</sup> ± 3.1 | 28.8 <sup>aA</sup> ± 2.6   | 31.5 <sup>aAB</sup> ± 2.7  | 34.6 <sup>aB</sup> ± 2.4 | 46.4 <sup>abC</sup> ± 2.6  | 59.0 <sup>cD</sup> ± 3.0  |
| 2.5%P/NaCS            | 27.7 <sup>aB</sup> ± 3.1 | 30.5 <sup>abBC</sup> ± 2.5 | 35.0 <sup>abCD</sup> ± 2.6 | 35.2 <sup>aD</sup> ± 2.4 | 38.6 <sup>aD</sup> ± 2.1   | 13.3 <sup>aA</sup> ± 2.4  |

Note: Different lowercase letters (a, b, c) indicate significant differences between storage time (day) in the same columns ( $p \leq 0.05$ ). Different uppercase letters (A, B, C) indicate significant differences between samples in the same rows ( $p \leq 0.05$ ).

**Table S6.** Effect of coating on hue angle of mango fruits.

| Storage time (day) | hue of mango peel         |                            |                           |                           |                           |                          |
|--------------------|---------------------------|----------------------------|---------------------------|---------------------------|---------------------------|--------------------------|
|                    | 0                         | 3                          | 6                         | 9                         | 12                        | 15                       |
| Uncoated           | 113.6 <sup>a</sup> ± 4.2  | 89.1 <sup>a</sup> ± 3.8    | 80.6 <sup>a</sup> ± 5.1   | 74.8 <sup>a</sup> ± 3.9   |                           |                          |
| 0.75%NaCS          | 113.6 <sup>a</sup> ± 4.2  | 95.5 <sup>ab</sup> ± 3.9   | 87.2 <sup>ab</sup> ± 3.8  | 79.2 <sup>ab</sup> ± 4.1  | 63.4 <sup>a</sup> ± 4.1   |                          |
| 1%NaCS             | 113.6 <sup>a</sup> ± 4.2  | 101.5 <sup>bc</sup> ± 3.6  | 90.4 <sup>bc</sup> ± 3.9  | 79.9 <sup>ab</sup> ± 4.1  | 68.2 <sup>a</sup> ± 4.1   |                          |
| 1.25%NaCS          | 113.6 <sup>aD</sup> ± 4.2 | 108.6 <sup>dD</sup> ± 3.9  | 96.8 <sup>cC</sup> ± 4.1  | 85.6 <sup>bcB</sup> ± 4.2 | 79.9 <sup>bAB</sup> ± 4.4 | 74.1 <sup>bA</sup> ± 3.9 |
| 1.5%P/NaCS         | 113.6 <sup>aD</sup> ± 4.2 | 105.3 <sup>cdC</sup> ± 4.3 | 93.6 <sup>bcB</sup> ± 3.6 | 88.6 <sup>cdB</sup> ± 3.8 | 79.2 <sup>bA</sup> ± 4.3  |                          |
| 2%P/NaCS           | 113.6 <sup>aC</sup> ± 4.2 | 110.4 <sup>dC</sup> ± 3.6  | 96.1 <sup>cB</sup> ± 3.8  | 94.0 <sup>dAB</sup> ± 4.3 | 90.9 <sup>cAB</sup> ± 3.6 | 86.7 <sup>cA</sup> ± 4.0 |
| 2.5%P/NaCS         | 113.6 <sup>aE</sup> ± 4.2 | 100.1 <sup>bcD</sup> ± 3.5 | 95.2 <sup>cd</sup> ± 3.6  | 80.3 <sup>abC</sup> ± 3.4 | 64.1 <sup>ab</sup> ± 4.1  | 56.8 <sup>aA</sup> ± 4.3 |

Note: Different lowercase letters (a, b, c) indicate significant differences between storage time (day) in the same columns ( $p \leq 0.05$ ). Different uppercase letters (A, B, C) indicate significant differences between samples in the same rows ( $p \leq 0.05$ ).

**Table S7.** Effect of coating on color (L\*) of mango flesh.

| Storage time (day) | L* of mango flesh        |                          |                            |                           |                           |                          |
|--------------------|--------------------------|--------------------------|----------------------------|---------------------------|---------------------------|--------------------------|
|                    | 0                        | 3                        | 6                          | 9                         | 12                        | 15                       |
| Uncoated           | 75.1 <sup>aB</sup> ± 3.5 | 77.0 <sup>aB</sup> ± 3.4 | 61.2 <sup>aA</sup> ± 2.8   | 59.9 <sup>aA</sup> ± 2.7  |                           |                          |
| 0.75%NaCS          | 75.1 <sup>aB</sup> ± 3.5 | 76.8 <sup>aB</sup> ± 3.2 | 72.6 <sup>bAB</sup> ± 3.9  | 70.6 <sup>bAB</sup> ± 3.6 | 67.5 <sup>aA</sup> ± 3.5  |                          |
| 1%NaCS             | 76.8 <sup>A</sup> ± 3.4  | 76.2 <sup>aA</sup> ± 3.6 | 76.9 <sup>bcA</sup> ± 3.8  | 80.6 <sup>cA</sup> ± 3.7  | 76.9 <sup>bA</sup> ± 4.0  |                          |
| 1.25%NaCS          | 76.8 <sup>aB</sup> ± 3.4 | 75.6 <sup>aA</sup> ± 3.9 | 77.9 <sup>bcAB</sup> ± 3.8 | 80.3 <sup>cAB</sup> ± 4.0 | 83.6 <sup>bcB</sup> ± 3.8 | 75.9 <sup>bA</sup> ± 3.2 |
| 1.5%P/NaCS         | 75.1 <sup>aA</sup> ± 3.5 | 77.5 <sup>aB</sup> ± 3.4 | 83.4 <sup>dB</sup> ± 4.1   | 81.9 <sup>cAB</sup> ± 3.8 | 78.4 <sup>bAB</sup> ± 3.4 |                          |
| 2%P/NaCS           | 75.1 <sup>aA</sup> ± 3.5 | 76.4 <sup>aB</sup> ± 3.4 | 76.9 <sup>bcAB</sup> ± 3.7 | 83.3 <sup>BC</sup> ± 4.1  | 85.6 <sup>cC</sup> ± 4.2  | 88.9 <sup>cC</sup> ± 3.8 |
| 2.5%P/NaCS         | 75.1 <sup>aB</sup> ± 3.5 | 76.1 <sup>aB</sup> ± 2.0 | 79.9 <sup>bcB</sup> ± 3.8  | 83.4 <sup>cC</sup> ± 4.2  | 76.5 <sup>bB</sup> ± 3.5  | 58.2 <sup>aA</sup> ± 2.4 |

Note: Different lowercase letters (a, b, c) indicate significant differences between storage time (day) in the same columns ( $p \leq 0.05$ ). Different uppercase letters (A, B, C) indicate significant differences between samples in the same rows ( $p \leq 0.05$ ).

**Table S8.** Effect of coating on color (a\*) of mango flesh.

| Storage time (day) | a* of mango flesh         |                             |                             |                            |                            |                           |
|--------------------|---------------------------|-----------------------------|-----------------------------|----------------------------|----------------------------|---------------------------|
|                    | 0                         | 3                           | 6                           | 9                          | 12                         | 15                        |
| Uncoated           | -19.2 <sup>aA</sup> ± 3.5 | -8.5 <sup>bB</sup> ± 3.4    | 5.5 <sup>cC</sup> ± 2.8     | 2.7 <sup>cC</sup> ± 2.7    |                            |                           |
| 0.75%NaCS          | -19.2 <sup>aA</sup> ± 3.5 | -11.8 <sup>abB</sup> ± 3.2  | -7.2 <sup>bBC</sup> ± 3.9   | -4.4 <sup>bC</sup> ± 3.6   | -1.9 <sup>bC</sup> ± 3.5   |                           |
| 1%NaCS             | -19.2 <sup>aA</sup> ± 3.4 | -12.1 <sup>abB</sup> ± 3.6  | -10.3 <sup>abBC</sup> ± 3.8 | -4.3 <sup>bCD</sup> ± 3.7  | -2.1 <sup>bD</sup> ± 4.0   |                           |
| 1.25%NaCS          | -19.2 <sup>aA</sup> ± 3.4 | -14.2 <sup>abAB</sup> ± 3.9 | -12.5 <sup>abAB</sup> ± 3.8 | -8.9 <sup>abBC</sup> ± 4.0 | -5.2 <sup>abC</sup> ± 3.8  | -3.2 <sup>abC</sup> ± 3.2 |
| 1.5%P/NaCS         | -19.2 <sup>aA</sup> ± 3.5 | -12.8 <sup>abAB</sup> ± 3.4 | -8.9 <sup>abB</sup> ± 4.1   | -5.7 <sup>abB</sup> ± 3.8  |                            |                           |
| 2%P/NaCS           | -19.2 <sup>aA</sup> ± 3.5 | -16.8 <sup>aAB</sup> ± 3.4  | -14.9 <sup>aAB</sup> ± 3.7  | -11.7 <sup>aBC</sup> ± 4.1 | -10.8 <sup>aBC</sup> ± 4.2 | -6.2 <sup>aC</sup> ± 3.8  |
| 2.5%P/NaCS         | -19.2 <sup>aA</sup> ± 3.5 | -15.7 <sup>aAB</sup> ± 2.0  | -9.9 <sup>abBC</sup> ± 3.8  | -6.6 <sup>abCD</sup> ± 4.2 | -2.7 <sup>bDE</sup> ± 3.5  | 1.6 <sup>bE</sup> ± 2.4   |

Note: Different lowercase letters (a, b, c) indicate significant differences between storage time (day) in the same columns ( $p \leq 0.05$ ). Different uppercase letters (A, B, C) indicate significant differences between samples in the same rows ( $p \leq 0.05$ ).

**Table S9.** Effect of coating on color ( $b^*$ ) of mango flesh.

| Storage time<br>(day)  | $b^*$ of mango flesh         |                               |                               |                               |                               |                              |
|------------------------|------------------------------|-------------------------------|-------------------------------|-------------------------------|-------------------------------|------------------------------|
|                        | 0                            | 3                             | 6                             | 9                             | 12                            | 15                           |
| Uncoated               | 62.1 <sup>aC</sup> $\pm$ 3.5 | 58.6 <sup>aBC</sup> $\pm$ 3.4 | 53.7 <sup>aAB</sup> $\pm$ 2.8 | 48.3 <sup>aA</sup> $\pm$ 2.7  |                               |                              |
| 0.75%NaCS              | 62.1 <sup>aD</sup> $\pm$ 3.5 | 59.0 <sup>aCD</sup> $\pm$ 3.2 | 54.0 <sup>aBC</sup> $\pm$ 3.9 | 49.1 <sup>aAB</sup> $\pm$ 3.6 | 43.5 <sup>ba</sup> $\pm$ 3.5  |                              |
| 1%NaCS                 | 62.1 <sup>aC</sup> $\pm$ 3.4 | 59.1 <sup>aC</sup> $\pm$ 3.6  | 55.0 <sup>aBC</sup> $\pm$ 4.8 | 49.9 <sup>aAB</sup> $\pm$ 3.7 | 45.6 <sup>ba</sup> $\pm$ 4.0  |                              |
| 1.25%NaCS              | 62.1 <sup>aD</sup> $\pm$ 3.4 | 59.1 <sup>aCD</sup> $\pm$ 3.9 | 54.1 <sup>aBC</sup> $\pm$ 3.8 | 52.3 <sup>aBC</sup> $\pm$ 4.0 | 47.3 <sup>ba</sup> $\pm$ 3.8  | 40.3 <sup>aA</sup> $\pm$ 3.2 |
| 1.5%P/NaCS             | 62.1 <sup>aD</sup> $\pm$ 3.5 | 59.6 <sup>aCD</sup> $\pm$ 3.4 | 55.1 <sup>aBC</sup> $\pm$ 4.1 | 50.1 <sup>aB</sup> $\pm$ 3.8  | 30.7 <sup>aA</sup> $\pm$ 3.4  |                              |
| 2%P/NaCS <sup>ns</sup> | 62.1 <sup>aA</sup> $\pm$ 3.5 | 62.9 <sup>aA</sup> $\pm$ 3.4  | 63.2 <sup>ba</sup> $\pm$ 3.7  | 64.1 <sup>ba</sup> $\pm$ 4.1  | 66.6 <sup>ca</sup> $\pm$ 4.2  | 69.0 <sup>ba</sup> $\pm$ 3.8 |
| 2.5%P/NaCS             | 62.1 <sup>aD</sup> $\pm$ 3.5 | 58.6 <sup>aCD</sup> $\pm$ 2.0 | 53.4 <sup>aC</sup> $\pm$ 3.8  | 45.9 <sup>aB</sup> $\pm$ 4.2  | 41.2 <sup>baB</sup> $\pm$ 3.5 | 38.7 <sup>aA</sup> $\pm$ 2.4 |

Note: Different lowercase letters (a, b, c) indicate significant differences ( $p \leq 0.05$ ). Different uppercase letters (A, B, C) indicate significant differences ( $p \leq 0.05$ ).

**Table S10.** Effect of coating on hue angle of mango flesh.

| Storage time<br>(day)   | hue of mango flesh           |                               |                               |                               |                                           |                              |
|-------------------------|------------------------------|-------------------------------|-------------------------------|-------------------------------|-------------------------------------------|------------------------------|
|                         | 0*                           | 3*                            | 6*                            | 9*                            | 12                                        | 15                           |
| Uncoated                | 99.7 <sup>aB</sup> $\pm$ 4.8 | 95.8 <sup>aAB</sup> $\pm$ 4.4 | 93.2 <sup>aAB</sup> $\pm$ 3.9 | 90.1 <sup>aA</sup> $\pm$ 4.0  |                                           |                              |
| 0.75%NaCS <sup>ns</sup> | 99.7 <sup>aA</sup> $\pm$ 4.8 | 96.1 <sup>aA</sup> $\pm$ 3.9  | 93.9 <sup>aA</sup> $\pm$ 4.1  | 91.5 <sup>aA</sup> $\pm$ 4.3  | 80.1 <sup>aA</sup> $\pm$ 4.2              |                              |
| 1%NaCS                  | 99.7 <sup>aB</sup> $\pm$ 4.8 | 96.8 <sup>aB</sup> $\pm$ 4.6  | 94.6 <sup>aB</sup> $\pm$ 4.8  | 92.5 <sup>aB</sup> $\pm$ 4.7  | 83.6 <sup>abA</sup> $\pm$ 5.1             |                              |
| 1.25%NaCS               | 99.7 <sup>aC</sup> $\pm$ 4.8 | 97.5 <sup>aC</sup> $\pm$ 4.5  | 95.1 <sup>aBC</sup> $\pm$ 4.8 | 93.1 <sup>aBC</sup> $\pm$ 5.1 | 86.6 <sup>abcAB</sup> $\pm$ 4.8           | 80.5 <sup>aA</sup> $\pm$ 4.2 |
| 1.5%P/NaCS              | 99.7 <sup>aB</sup> $\pm$ 4.8 | 98.4 <sup>aAB</sup> $\pm$ 4.4 | 95.1 <sup>aAB</sup> $\pm$ 5.1 | 92.1 <sup>aAB</sup> $\pm$ 4.8 | 90.0 <sup>bcA</sup> $\pm$ 4.4             |                              |
| 2%P/NaCS <sup>ns</sup>  | 99.7 <sup>aA</sup> $\pm$ 4.8 | 98.5 <sup>aA</sup> $\pm$ 4.4  | 97.3 <sup>aA</sup> $\pm$ 4.7  | 96.1 <sup>aA</sup> $\pm$ 4.8  | 94.8 <sup>ca</sup> $\pm$ 5.0              | 93.2 <sup>ba</sup> $\pm$ 5.7 |
| 2.5%P/NaCS              | 99.7 <sup>aC</sup> $\pm$ 4.8 | 97.3 <sup>aC</sup> $\pm$ 3.0  | 95.0 <sup>aBC</sup> $\pm$ 4.2 | 93.0 <sup>aBC</sup> $\pm$ 4.8 | 87.5 <sup>a<sup>bc</sup>B</sup> $\pm$ 4.5 | 75.7 <sup>aA</sup> $\pm$ 4.4 |

Note: Different lowercase letters (a, b, c) indicate significant differences ( $p \leq 0.05$ ). Different uppercase letters (A, B, C) indicate significant differences ( $p \leq 0.05$ ).

**Table S11.** Effect of coating on TSS of mango fruits.

| Storage time<br>(day) | TSS (%)                 |                          |                          |                           |                          |                          |
|-----------------------|-------------------------|--------------------------|--------------------------|---------------------------|--------------------------|--------------------------|
|                       | 0                       | 3                        | 6                        | 9                         | 12                       | 15                       |
| Uncoated              | 4.7 <sup>aA</sup> ± 0.2 | 13.0 <sup>dB</sup> ± 0.6 | 17.1 <sup>fC</sup> ± 0.7 | 15.7 <sup>bD</sup> ± 0.6  |                          |                          |
| 0.75%NaCS             | 4.7 <sup>aA</sup> ± 0.2 | 9.5 <sup>cB</sup> ± 0.6  | 16.5 <sup>fC</sup> ± 0.7 | 20.6 <sup>eD</sup> ± 0.9  | 19.4 <sup>bD</sup> ± 0.9 |                          |
| 1%NaCS                | 4.7 <sup>aA</sup> ± 0.2 | 9.1 <sup>cB</sup> ± 0.4  | 15.3 <sup>eD</sup> ± 0.6 | 18.9 <sup>dE</sup> ± 0.7  | 22.1 <sup>cF</sup> ± 0.9 | 20.4 <sup>bC</sup> ± 1.0 |
| 1.25%NaCS             | 4.7 <sup>aA</sup> ± 0.2 | 6.2 <sup>bB</sup> ± 0.3  | 12.3 <sup>cC</sup> ± 0.6 | 18.3 <sup>cdD</sup> ± 0.8 | 20.9 <sup>cE</sup> ± 0.9 | 19.5 <sup>bE</sup> ± 0.9 |
| 1.5%P/NaCS            | 4.7 <sup>aA</sup> ± 0.2 | 8.9 <sup>cB</sup> ± 0.3  | 14.2 <sup>dC</sup> ± 0.6 | 17.8 <sup>cdD</sup> ± 0.9 | 22.4 <sup>cE</sup> ± 1.0 |                          |
| 2%P/NaCS              | 4.7 <sup>aA</sup> ± 0.2 | 5.6 <sup>abA</sup> ± 0.2 | 10.2 <sup>bB</sup> ± 0.5 | 17.1 <sup>cC</sup> ± 0.6  | 18.2 <sup>bD</sup> ± 0.7 | 20.1 <sup>bE</sup> ± 0.9 |
| 2.5%P/NaCS            | 4.7 <sup>aA</sup> ± 0.2 | 4.9 <sup>aA</sup> ± 0.3  | 5.1 <sup>aA</sup> ± 0.5  | 6.8 <sup>aB</sup> ± 0.4   | 8.1 <sup>aC</sup> ± 0.5  | 10.9 <sup>aD</sup> ± 0.4 |

Note: Different lowercase letters (a, b, c) indicate significant differences ( $p \leq 0.05$ ). Different upper-case letters (A, B, C) indicate significant differences ( $p \leq 0.05$ ).

**Table S12.** Effect of coating on TA of mango fruits.

| Storage time<br>(day) | TA (%)                    |                             |                             |                             |                            |                            |
|-----------------------|---------------------------|-----------------------------|-----------------------------|-----------------------------|----------------------------|----------------------------|
|                       | 0                         | 3                           | 6                           | 9                           | 12                         | 15                         |
| Uncoated              | 0.85 <sup>aC</sup> ± 0.04 | 0.80 <sup>aC</sup> ± 0.04   | 0.65 <sup>aB</sup> ± 0.03   | 0.45 <sup>aA</sup> ± 0.02   |                            |                            |
| 0.75%NaCS             | 0.85 <sup>aD</sup> ± 0.04 | 0.81 <sup>aD</sup> ± 0.04   | 0.68 <sup>abC</sup> ± 0.03  | 0.58 <sup>bB</sup> ± 0.02   | 0.49 <sup>aA</sup> ± 0.02  |                            |
| 1%NaCS                | 0.85 <sup>aD</sup> ± 0.04 | 0.82 <sup>aD</sup> ± 0.04   | 0.69 <sup>abC</sup> ± 0.03  | 0.60 <sup>bcB</sup> ± 0.03  | 0.55 <sup>cB</sup> ± 0.02  | 0.48 <sup>aA</sup> ± 0.03  |
| 1.25%NaCS             | 0.85 <sup>aD</sup> ± 0.04 | 0.83 <sup>aD</sup> ± 0.04   | 0.70 <sup>bcC</sup> ± 0.03  | 0.61 <sup>bcB</sup> ± 0.02  | 0.58 <sup>bB</sup> ± 0.02  | 0.52 <sup>baA</sup> ± 0.03 |
| 1.5%P/NaCS            | 0.85 <sup>aD</sup> ± 0.04 | 0.83 <sup>aD</sup> ± 0.001  | 0.70 <sup>bcC</sup> ± 0.002 | 0.62 <sup>bcB</sup> ± 0.001 | 0.52 <sup>dA</sup> ± 0.001 |                            |
| 2%P/NaCS              | 0.85 <sup>aC</sup> ± 0.04 | 0.83 <sup>aC</sup> ± 0.04   | 0.75 <sup>cB</sup> ± 0.03   | 0.70 <sup>dB</sup> ± 0.03   | 0.60 <sup>dA</sup> ± 0.03  | 0.56 <sup>cA</sup> ± 0.02  |
| 2.5%P/NaCS            | 0.85 <sup>aD</sup> ± 0.04 | 0.83 <sup>aCD</sup> ± 0.002 | 0.81 <sup>dC</sup> ± 0.001  | 0.77 <sup>eB</sup> ± 0.002  | 0.74 <sup>eB</sup> ± 0.001 | 0.70 <sup>dA</sup> ± 0.001 |

Note: Different lowercase letters (a, b, c) indicate significant differences ( $p \leq 0.05$ ). Different upper-case letters (A, B, C) indicate significant differences ( $p \leq 0.05$ ).

**Table S13.** Effect of coating on Vitamin C of mango fruits.

| Storage time<br>(day) | Vitamin C (g/100 g fruit)   |                              |                             |                              |                               |                              |
|-----------------------|-----------------------------|------------------------------|-----------------------------|------------------------------|-------------------------------|------------------------------|
|                       | 0                           | 3                            | 6                           | 9                            | 12                            | 15                           |
| Uncoated              | 0.045 <sup>aD</sup> ± 0.002 | 0.040 <sup>aC</sup> ± 0.002  | 0.035 <sup>ab</sup> ± 0.001 | 0.020 <sup>aA</sup> ± 0.001  |                               |                              |
| 0.75%NaCS             | 0.045 <sup>aE</sup> ± 0.002 | 0.041 <sup>abD</sup> ± 0.001 | 0.036 <sup>aC</sup> ± 0.002 | 0.028 <sup>bB</sup> ± 0.001  | 0.025 <sup>aA</sup> ± 0.002   |                              |
| 1%NaCS                | 0.045 <sup>aD</sup> ± 0.002 | 0.041 <sup>abD</sup> ± 0.001 | 0.036 <sup>aC</sup> ± 0.001 | 0.030 <sup>bcB</sup> ± 0.002 | 0.027 <sup>abAB</sup> ± 0.001 | 0.025 <sup>aA</sup> ± 0.001  |
| 1.25%NaCS             | 0.045 <sup>aD</sup> ± 0.002 | 0.042 <sup>abC</sup> ± 0.002 | 0.037 <sup>ab</sup> ± 0.001 | 0.032 <sup>cdA</sup> ± 0.002 | 0.031 <sup>abA</sup> ± 0.001  | 0.030 <sup>baA</sup> ± 0.002 |
| 1.5%P/NaCS            | 0.045 <sup>aE</sup> ± 0.002 | 0.041 <sup>abD</sup> ± 0.001 | 0.037 <sup>aC</sup> ± 0.002 | 0.033 <sup>dB</sup> ± 0.001  | 0.029 <sup>bcA</sup> ± 0.001  |                              |
| 2%P/NaCS              | 0.045 <sup>aC</sup> ± 0.002 | 0.043 <sup>bC</sup> ± 0.001  | 0.043 <sup>bC</sup> ± 0.002 | 0.040 <sup>eB</sup> ± 0.002  | 0.038 <sup>dB</sup> ± 0.002   | 0.035 <sup>cA</sup> ± 0.002  |

|          |                            |                        |                              |                        |                             |                       |
|----------|----------------------------|------------------------|------------------------------|------------------------|-----------------------------|-----------------------|
| 2.5%P/Na | 0.045 <sup>D</sup> ± 0.002 | 0.043 <sup>bCD</sup> ± | 0.042 <sup>bCD</sup> ± 0.001 | 0.041 <sup>eBC</sup> ± | 0.039 <sup>dB</sup> ± 0.001 | 0.036 <sup>cA</sup> ± |
| CS       |                            | 0.002                  |                              | 0.002                  |                             | 0.001                 |

Note: Different lowercase letters (a, b, c) indicate significant differences ( $p \leq 0.05$ ). Different uppercase letters (A, B, C) indicate significant differences ( $p \leq 0.05$ ).

## 2. Effects of storage temperature on shelf life and some quality traits of mango fruits

**Table S14.** Effect of storage temperature on weight loss of mango fruits.

| Temperature (°C) | coating   | Weight loss (%)         |                         |                          |                          |                          |                          |                         |                         |                         |
|------------------|-----------|-------------------------|-------------------------|--------------------------|--------------------------|--------------------------|--------------------------|-------------------------|-------------------------|-------------------------|
|                  |           | Storage time (days)     |                         |                          |                          |                          |                          |                         |                         |                         |
|                  |           | 0                       | 3                       | 6                        | 9                        | 12                       | 15                       | 18                      | 21                      | 24                      |
| 17               | uncoating | 6.9 <sup>aB</sup> ± 0.8 | 5.4 <sup>bA</sup> ± 0.2 | 9.3 <sup>dC</sup> ± 0.4  | 15.8 <sup>dD</sup> ± 0.7 | 21.7 <sup>dE</sup> ± 0.9 | 26.7 <sup>cF</sup> ± 1.2 |                         |                         |                         |
|                  | coating   | 6.9 <sup>aD</sup> ± 0.8 | 1.8 <sup>aA</sup> ± 1.8 | 3.4 <sup>aB</sup> ± 0.2  | 5.0 <sup>aC</sup> ± 0.3  | 6.5 <sup>aD</sup> ± 0.3  | 8.4 <sup>aE</sup> ± 0.4  | 10.4 <sup>F</sup> ± 0.5 | 12.8 <sup>G</sup> ± 0.6 | 14.3 <sup>H</sup> ± 0.6 |
|                  | uncoating | 6.9 <sup>aA</sup> ± 0.8 | 6.9 <sup>cA</sup> ± 0.3 | 16.4 <sup>eB</sup> ± 0.8 | 21.8 <sup>eC</sup> ± 1.0 |                          |                          |                         |                         |                         |
|                  | coating   | 6.9 <sup>aC</sup> ± 0.8 | 2.2 <sup>aA</sup> ± 0.1 | 5.2 <sup>bB</sup> ± 0.3  | 8.5 <sup>bD</sup> ± 0.4  | 11.2 <sup>bE</sup> ± 0.5 | 15.8 <sup>bF</sup> ± 0.7 |                         |                         |                         |
| 25               | uncoating | 6.9 <sup>aA</sup> ± 0.8 | 7.5 <sup>cA</sup> ± 0.3 | 18.1 <sup>fB</sup> ± 0.9 | 23.2 <sup>cC</sup> ± 0.9 |                          |                          |                         |                         |                         |
|                  | coating   | 6.9 <sup>aB</sup> ± 0.8 | 3.0 <sup>aA</sup> ± 0.1 | 7.7 <sup>cB</sup> ± 0.3  | 12.6 <sup>cC</sup> ± 0.6 | 17.0 <sup>cD</sup> ± 0.8 |                          |                         |                         |                         |
|                  | uncoating | 6.9 <sup>aA</sup> ± 0.8 | 7.5 <sup>cA</sup> ± 0.3 | 18.1 <sup>fB</sup> ± 0.9 | 23.2 <sup>cC</sup> ± 0.9 |                          |                          |                         |                         |                         |
|                  | coating   | 6.9 <sup>aB</sup> ± 0.8 | 3.0 <sup>aA</sup> ± 0.1 | 7.7 <sup>cB</sup> ± 0.3  | 12.6 <sup>cC</sup> ± 0.6 | 17.0 <sup>cD</sup> ± 0.8 |                          |                         |                         |                         |
| 32               | uncoating | 6.9 <sup>aA</sup> ± 0.8 | 7.5 <sup>cA</sup> ± 0.3 | 18.1 <sup>fB</sup> ± 0.9 | 23.2 <sup>cC</sup> ± 0.9 |                          |                          |                         |                         |                         |
|                  | coating   | 6.9 <sup>aB</sup> ± 0.8 | 3.0 <sup>aA</sup> ± 0.1 | 7.7 <sup>cB</sup> ± 0.3  | 12.6 <sup>cC</sup> ± 0.6 | 17.0 <sup>cD</sup> ± 0.8 |                          |                         |                         |                         |
|                  | uncoating | 6.9 <sup>aA</sup> ± 0.8 | 7.5 <sup>cA</sup> ± 0.3 | 18.1 <sup>fB</sup> ± 0.9 | 23.2 <sup>cC</sup> ± 0.9 |                          |                          |                         |                         |                         |
|                  | coating   | 6.9 <sup>aB</sup> ± 0.8 | 3.0 <sup>aA</sup> ± 0.1 | 7.7 <sup>cB</sup> ± 0.3  | 12.6 <sup>cC</sup> ± 0.6 | 17.0 <sup>cD</sup> ± 0.8 |                          |                         |                         |                         |

Note: Different lowercase letters (a, b, c) indicate significant differences between storage time (day) in the same columns ( $p \leq 0.05$ ). Different uppercase letters (A, B, C) indicate significant differences between temperature (°C) in the same rows ( $p \leq 0.05$ ).

**Table S15.** Effect of storage temperature on firmness of mango fruits.

| Temperature (°C) | coating   | Firmness (N)             |                          |                          |                          |                          |                          |                        |                        |                        |
|------------------|-----------|--------------------------|--------------------------|--------------------------|--------------------------|--------------------------|--------------------------|------------------------|------------------------|------------------------|
|                  |           | Storage time (days)      |                          |                          |                          |                          |                          |                        |                        |                        |
|                  |           | 0                        | 3                        | 6                        | 9                        | 12                       | 15                       | 18                     | 21                     | 24                     |
| 17               | uncoating | 31.2 <sup>aF</sup> ± 1.5 | 23.4 <sup>cE</sup> ± 1.2 | 15.5 <sup>dD</sup> ± 0.8 | 7.2 <sup>bC</sup> ± 0.3  | 2.6 <sup>aB</sup> ± 0.2  | 0.9 <sup>aA</sup> ± 0.05 |                        |                        |                        |
|                  | coating   | 31.8 <sup>aI</sup> ± 1.5 | 27.6 <sup>dH</sup> ± 1.3 | 23.4 <sup>eG</sup> ± 1.2 | 19.9 <sup>cF</sup> ± 0.9 | 15.4 <sup>cE</sup> ± 0.7 | 10.3 <sup>cD</sup> ± 0.5 | 6.1 <sup>C</sup> ± 0.3 | 3.2 <sup>B</sup> ± 0.2 | 1.2 <sup>A</sup> ± 0.1 |
|                  | uncoating | 31.2 <sup>aD</sup> ± 1.5 | 13.1 <sup>aC</sup> ± 0.6 | 8.4 <sup>bB</sup> ± 0.4  | 0.9 <sup>aA</sup> ± 0.01 |                          |                          |                        |                        |                        |
|                  | coating   | 31.2 <sup>aF</sup> ± 1.5 | 25.8 <sup>dE</sup> ± 1.2 | 23.1 <sup>eD</sup> ± 1.2 | 19.9 <sup>cC</sup> ± 0.9 | 10.9 <sup>bB</sup> ± 0.5 | 4.0 <sup>bA</sup> ± 0.2  |                        |                        |                        |
| 25               | uncoating | 31.2 <sup>aD</sup> ± 1.5 | 13.1 <sup>aC</sup> ± 0.6 | 8.4 <sup>bB</sup> ± 0.4  | 0.9 <sup>aA</sup> ± 0.01 |                          |                          |                        |                        |                        |
|                  | coating   | 31.2 <sup>aF</sup> ± 1.5 | 25.8 <sup>dE</sup> ± 1.2 | 23.1 <sup>eD</sup> ± 1.2 | 19.9 <sup>cC</sup> ± 0.9 | 10.9 <sup>bB</sup> ± 0.5 | 4.0 <sup>bA</sup> ± 0.2  |                        |                        |                        |
|                  | uncoating | 31.2 <sup>aD</sup> ± 1.5 | 13.1 <sup>aC</sup> ± 0.6 | 8.4 <sup>bB</sup> ± 0.4  | 0.9 <sup>aA</sup> ± 0.01 |                          |                          |                        |                        |                        |
|                  | coating   | 31.2 <sup>aF</sup> ± 1.5 | 25.8 <sup>dE</sup> ± 1.2 | 23.1 <sup>eD</sup> ± 1.2 | 19.9 <sup>cC</sup> ± 0.9 | 10.9 <sup>bB</sup> ± 0.5 | 4.0 <sup>bA</sup> ± 0.2  |                        |                        |                        |
| 32               | uncoating | 30.8 <sup>aD</sup> ± 1.5 | 12.6 <sup>aC</sup> ± 0.6 | 5.1 <sup>aB</sup> ± 0.2  | 0.2 <sup>aA</sup> ± 0.01 |                          |                          |                        |                        |                        |
|                  | coating   | 30.4 <sup>aE</sup> ± 1.5 | 20.5 <sup>bD</sup> ± 1.0 | 13.8 <sup>cC</sup> ± 0.6 | 6.6 <sup>bB</sup> ± 0.3  | 2.5 <sup>aA</sup> ± 0.1  |                          |                        |                        |                        |
|                  | uncoating | 30.8 <sup>aD</sup> ± 1.5 | 12.6 <sup>aC</sup> ± 0.6 | 5.1 <sup>aB</sup> ± 0.2  | 0.2 <sup>aA</sup> ± 0.01 |                          |                          |                        |                        |                        |
|                  | coating   | 30.4 <sup>aE</sup> ± 1.5 | 20.5 <sup>bD</sup> ± 1.0 | 13.8 <sup>cC</sup> ± 0.6 | 6.6 <sup>bB</sup> ± 0.3  | 2.5 <sup>aA</sup> ± 0.1  |                          |                        |                        |                        |

Note: Different lowercase letters (a, b, c) indicate significant differences between storage time (day) in the same columns ( $p \leq 0.05$ ). Different uppercase letters (A, B, C) indicate significant differences between temperature (°C) in the same rows ( $p \leq 0.05$ ).

**Table S16.** Effect of storage temperature on color (L\*) of mango fruits.

| Temperature (°C) | coating   | L* of mango fruits        |                            |                            |                            |                            |                            |                          |                          |                         |
|------------------|-----------|---------------------------|----------------------------|----------------------------|----------------------------|----------------------------|----------------------------|--------------------------|--------------------------|-------------------------|
|                  |           | Storage time (days)       |                            |                            |                            |                            |                            |                          |                          |                         |
|                  |           | 0                         | 3                          | 6                          | 9                          | 12                         | 15                         | 18                       | 21                       | 24                      |
| 17               | uncoating | 53.4 <sup>aAB</sup> ± 2.1 | 55.4 <sup>abBC</sup> ± 1.9 | 57.2 <sup>abBC</sup> ± 2.4 | 59.3 <sup>bC</sup> ± 2.3   | 50.2 <sup>aB</sup> ± 2.2   | 43.4 <sup>aA</sup> ± 1.8   |                          |                          |                         |
|                  | coating   | 53.4 <sup>aA</sup> ± 2.1  | 53.4 <sup>aA</sup> ± 2.6   | 53.7 <sup>aA</sup> ± 2.5   | 53.9 <sup>aAB</sup> ± 2.4  | 54.2 <sup>abAB</sup> ± 2.3 | 54.8 <sup>abAB</sup> ± 2.5 | 56.2 <sup>AB</sup> ± 2.6 | 58.6 <sup>BC</sup> ± 2.9 | 61.2 <sup>C</sup> ± 2.5 |
| 25               | uncoating | 53.4 <sup>aA</sup> ± 2.1  | 58.8 <sup>bAB</sup> ± 2.3  | 55.8 <sup>abB</sup> ± 2.4  | 72.1 <sup>cC</sup> ± 2.8   |                            |                            |                          |                          |                         |
|                  | coating   | 53.4 <sup>aA</sup> ± 2.1  | 55.2 <sup>abAB</sup> ± 2.6 | 54.2 <sup>abAB</sup> ± 2.5 | 53.5 <sup>aA</sup> ± 2.4   | 56.7 <sup>bcBC</sup> ± 2.6 | 59.1 <sup>bC</sup> ± 3.0   |                          |                          |                         |
| 32               | uncoating | 53.4 <sup>aA</sup> ± 2.1  | 55.7 <sup>abAB</sup> ± 2.1 | 58.9 <sup>bB</sup> ± 2.6   | 68.8 <sup>cC</sup> ± 2.9   |                            |                            |                          |                          |                         |
|                  | coating   | 53.4 <sup>aAB</sup> ± 2.1 | 52.1 <sup>aA</sup> ± 2.4   | 54.6 <sup>abAB</sup> ± 2.1 | 57.5 <sup>abBC</sup> ± 2.3 | 59.8 <sup>cC</sup> ± 2.9   |                            |                          |                          |                         |

Note: Different lowercase letters (a, b, c) indicate significant differences between storage time (day) in the same columns ( $p \leq 0.05$ ). Different uppercase letters (A, B, C) indicate significant differences between temperature (°C) in the same rows ( $p \leq 0.05$ ).

**Table S17.** Effect of storage temperature on color (L\*) of mango flesh.

| Temperature (°C) | coating   | L* of mango flesh        |                           |                            |                             |                             |                          |                          |                           |                            |
|------------------|-----------|--------------------------|---------------------------|----------------------------|-----------------------------|-----------------------------|--------------------------|--------------------------|---------------------------|----------------------------|
|                  |           | Storage time (days)      |                           |                            |                             |                             |                          |                          |                           |                            |
|                  |           | 0                        | 3                         | 6                          | 9                           | 12                          | 15                       | 18                       | 21                        | 24                         |
| 17               | uncoating | 75.1 <sup>aA</sup> ± 3.2 | 77.5 <sup>aAB</sup> ± 3.3 | 78.9 <sup>aAB</sup> ± 3.1  | 82.7 <sup>bB</sup> ± 3.9    | 82.7 <sup>aB</sup> ± 2.5    | 82.8 <sup>aB</sup> ± 3.8 |                          |                           |                            |
|                  | coating   | 75.1 <sup>aA</sup> ± 3.2 | 75.9 <sup>aAB</sup> ± 3.6 | 77.1 <sup>aABC</sup> ± 3.5 | 78.4 <sup>abABC</sup> ± 3.9 | 81.1 <sup>aABCD</sup> ± 3.8 | 85.9 <sup>aD</sup> ± 3.8 | 83.1 <sup>CD</sup> ± 3.8 | 82.4 <sup>BCD</sup> ± 3.4 | 80.2 <sup>ABCD</sup> ± 3.5 |
| 25               | uncoating | 75.1 <sup>aA</sup> ± 3.2 | 77.0 <sup>aA</sup> ± 2.6  | 81.2 <sup>aA</sup> ± 3.1   | 79.9 <sup>abA</sup> ± 3.2   |                             |                          |                          |                           |                            |
|                  | coating   | 75.1 <sup>aA</sup> ± 3.2 | 79.8 <sup>aAB</sup> ± 3.1 | 76.9 <sup>aA</sup> ± 3.5   | 83.3 <sup>bB</sup> ± 2.6    | 83.3 <sup>aB</sup> ± 3.4    | 83.3 <sup>aB</sup> ± 3.6 |                          |                           |                            |
| 32               | uncoating | 75.1 <sup>aA</sup> ± 3.2 | 78.2 <sup>aA</sup> ± 3.1  | 80.4 <sup>aA</sup> ± 2.8   | 75.0 <sup>aA</sup> ± 2.6    |                             |                          |                          |                           |                            |
|                  | coating   | 75.1 <sup>aA</sup> ± 3.2 | 76.6 <sup>aA</sup> ± 3.1  | 78.9 <sup>aAB</sup> ± 3.0  | 80.8 <sup>abAB</sup> ± 2.8  | 83.4 <sup>aB</sup> ± 2.9    |                          |                          |                           |                            |

Note: Different lowercase letters (a, b, c) indicate significant differences between storage time (day) in the same columns ( $p \leq 0.05$ ). Different uppercase letters (A, B, C) indicate significant differences between temperature (°C) in the same rows ( $p \leq 0.05$ ).

**Table S18.** Effect of storage temperature on hue color of mango fruits.

| Temperature (°C) | coating | Hue color of mango fruits |                            |                            |                            |                            |                           |                          |                          |                         |
|------------------|---------|---------------------------|----------------------------|----------------------------|----------------------------|----------------------------|---------------------------|--------------------------|--------------------------|-------------------------|
|                  |         | Storage time (days)       |                            |                            |                            |                            |                           |                          |                          |                         |
|                  |         | 0                         | 3                          | 6                          | 9                          | 12                         | 15                        | 18                       | 21                       | 24                      |
| 17               | uncoat- | 113.6 <sup>aD</sup> ± 5.3 | 108.2 <sup>bCD</sup> ± 4.5 | 103.9 <sup>cC</sup> ± 4.3  | 95.7 <sup>dB</sup> ± 4.1   | 85.6 <sup>abA</sup> ± 3.9  | 79.5 <sup>aA</sup> ± 3.9  |                          |                          |                         |
|                  | ing     |                           |                            |                            |                            |                            |                           |                          |                          |                         |
|                  | coating | 113.6 <sup>aG</sup> ± 5.3 | 108.2 <sup>bFG</sup> ± 4.9 | 103.8 <sup>cEF</sup> ± 4.3 | 98.7 <sup>dDE</sup> ± 4.1  | 95.6 <sup>cCD</sup> ± 3.9  | 92.5 <sup>bCD</sup> ± 3.8 | 88.9 <sup>BC</sup> ± 3.8 | 84.5 <sup>AB</sup> ± 4.1 | 80.5 <sup>A</sup> ± 3.4 |
| 25               | uncoat- | 113.6 <sup>aC</sup> ± 5.3 | 89.1 <sup>aB</sup> ± 4.1   | 86.1 <sup>bB</sup> ± 3.9   | 74.8 <sup>bA</sup> ± 3.5   |                            |                           |                          |                          |                         |
|                  | ing     |                           |                            |                            |                            |                            |                           |                          |                          |                         |
|                  | coating | 113.6 <sup>aC</sup> ± 5.3 | 110.3 <sup>bC</sup> ± 5.3  | 96.1 <sup>cB</sup> ± 4.5   | 94.0 <sup>cdAB</sup> ± 3.8 | 90.9 <sup>cdAB</sup> ± 4.3 | 86.8 <sup>abA</sup> ± 3.8 |                          |                          |                         |
| 32               | uncoat- | 113.6 <sup>aD</sup> ± 5.3 | 89.2 <sup>aC</sup> ± 3.6   | 70.3 <sup>aB</sup> ± 2.9   | 52.1 <sup>aA</sup> ± 3.6   |                            |                           |                          |                          |                         |
|                  | ing     |                           |                            |                            |                            |                            |                           |                          |                          |                         |
|                  | coating | 113.6 <sup>aC</sup> ± 5.3 | 106.9 <sup>bBC</sup> ± 4.5 | 98.8 <sup>cB</sup> ± 4.5   | 87.5 <sup>cA</sup> ± 3.8   | 81.5 <sup>aA</sup> ± 3.9   |                           |                          |                          |                         |

Note: Different lowercase letters (a, b, c) indicate significant differences between storage time (day) in the same columns ( $p \leq 0.05$ ). Different uppercase letters (A, B, C) indicate significant differences between temperature (°C) in the same rows ( $p \leq 0.05$ ).

**Table S19.** Effect of storage temperature on hue color of mango flesh.

| Temperature (°C) | coating | Hue color of mango flesh |                            |                            |                            |                             |                             |                           |                          |                         |
|------------------|---------|--------------------------|----------------------------|----------------------------|----------------------------|-----------------------------|-----------------------------|---------------------------|--------------------------|-------------------------|
|                  |         | Storage time (days)      |                            |                            |                            |                             |                             |                           |                          |                         |
|                  |         | 0                        | 3                          | 6                          | 9                          | 12                          | 15                          | 18                        | 21                       | 24                      |
| 17               | uncoat- | 99.7 <sup>aB</sup> ± 6.2 | 97.2 <sup>abAB</sup> ± 5.2 | 94.2 <sup>bAB</sup> ± 4.6  | 92.8 <sup>bAB</sup> ± 4.3  | 90.0 <sup>aA</sup> ± 4.6    | 88.7 <sup>aA</sup> ± 4.5    |                           |                          |                         |
|                  | ing     |                          |                            |                            |                            |                             |                             |                           |                          |                         |
|                  | coating | 99.7 <sup>aD</sup> ± 6.2 | 99.1 <sup>bCD</sup> ± 3.5  | 97.5 <sup>bBCD</sup> ± 3.8 | 96.2 <sup>bBCD</sup> ± 4.1 | 94.5 <sup>aABCD</sup> ± 2.9 | 93.2 <sup>aABCD</sup> ± 3.1 | 91.8 <sup>ABC</sup> ± 3.6 | 90.0 <sup>AB</sup> ± 4.1 | 88.4 <sup>A</sup> ± 4.2 |
| 25               | uncoat- | 99.7 <sup>aB</sup> ± 6.2 | 96.7 <sup>abAB</sup> ± 4.2 | 93.2 <sup>bAB</sup> ± 4.1  | 90.1 <sup>bA</sup> ± 3.8   |                             |                             |                           |                          |                         |
|                  | ing     |                          |                            |                            |                            |                             |                             |                           |                          |                         |
|                  | coating | 99.7 <sup>aA</sup> ± 6.2 | 98.5 <sup>bA</sup> ± 4.5   | 97.3 <sup>bA</sup> ± 4.2   | 96.0 <sup>bA</sup> ± 4.1   | 94.8 <sup>aA</sup> ± 3.8    | 92.2 <sup>aA</sup> ± 3.5    |                           |                          |                         |
| 32               | uncoat- | 99.7 <sup>aD</sup> ± 6.2 | 90.4 <sup>aC</sup> ± 3.5   | 80.4 <sup>aB</sup> ± 2.9   | 72.1 <sup>aA</sup> ± 3.6   |                             |                             |                           |                          |                         |
|                  | ing     |                          |                            |                            |                            |                             |                             |                           |                          |                         |
|                  | coating | 99.7 <sup>aB</sup> ± 6.2 | 96.3 <sup>abAB</sup> ± 3.8 | 94.1 <sup>bAB</sup> ± 3.8  | 92.1 <sup>bAB</sup> ± 4.1  | 89.5 <sup>aA</sup> ± 3.9    |                             |                           |                          |                         |

Note: Different lowercase letters (a, b, c) indicate significant differences between storage time (day) in the same columns ( $p \leq 0.05$ ). Different uppercase letters (A, B, C) indicate significant differences between temperature (°C) in the same rows ( $p \leq 0.05$ ).

**Table S20.** Effect of storage temperature on the total microbial of mango fruits.

| Temperature (°C) | coating | log (CFU/g fruit)       |                         |                         |                          |                          |                          |                        |                        |                        |
|------------------|---------|-------------------------|-------------------------|-------------------------|--------------------------|--------------------------|--------------------------|------------------------|------------------------|------------------------|
|                  |         | Storage time (days)     |                         |                         |                          |                          |                          |                        |                        |                        |
|                  |         | 0                       | 3                       | 6                       | 9                        | 12                       | 15                       | 18                     | 21                     | 24                     |
| 17               | uncoat- | 1.2 <sup>aA</sup> ± 0.1 | 4.0 <sup>cB</sup> ± 0.2 | 6.3 <sup>cC</sup> ± 0.3 | 8.9 <sup>dD</sup> ± 0.4  | 10.9 <sup>dE</sup> ± 0.4 | 12.5 <sup>cF</sup> ± 0.5 |                        |                        |                        |
|                  | ing     |                         |                         |                         |                          |                          |                          |                        |                        |                        |
|                  | coating | 1.2 <sup>aA</sup> ± 0.1 | 1.7 <sup>aB</sup> ± 0.1 | 1.9 <sup>aB</sup> ± 0.1 | 2.3 <sup>aC</sup> ± 0.1  | 2.7 <sup>aD</sup> ± 0.1  | 3.6 <sup>aE</sup> ± 0.2  | 4.0 <sup>F</sup> ± 0.2 | 4.7 <sup>G</sup> ± 0.2 | 5.0 <sup>H</sup> ± 0.3 |
| 25               | uncoat- | 1.2 <sup>aA</sup> ± 0.1 | 5.2 <sup>dB</sup> ± 0.3 | 8.9 <sup>dC</sup> ± 0.4 | 12.3 <sup>dD</sup> ± 0.4 |                          |                          |                        |                        |                        |
|                  | ing     |                         |                         |                         |                          |                          |                          |                        |                        |                        |
|                  | coating | 1.2 <sup>aA</sup> ± 0.1 | 2.7 <sup>bB</sup> ± 0.1 | 3.2 <sup>bC</sup> ± 0.2 | 4.7 <sup>bD</sup> ± 0.2  | 5.0 <sup>bE</sup> ± 0.3  | 5.3 <sup>bE</sup> ± 0.3  |                        |                        |                        |



|    |         |                     |                     |                      |                      |                     |
|----|---------|---------------------|---------------------|----------------------|----------------------|---------------------|
| 32 | uncoat- | 1.2 <sup>aA</sup> ± | 5.7 <sup>eB</sup> ± | 10.0 <sup>eC</sup> ± | 13.6 <sup>eD</sup> ± |                     |
|    | ing     | 0.1                 | 0.3                 | 0.5                  | 0.6                  |                     |
|    | coating | 1.2 <sup>aA</sup> ± | 2.4 <sup>bB</sup> ± | 3.7 <sup>bC</sup> ±  | 4.8 <sup>bD</sup> ±  | 6.2 <sup>cE</sup> ± |
|    |         | 0.1                 | 0.1                 | 0.2                  | 0.2                  | 0.3                 |

Note: Different lowercase letters (a, b, c) indicate significant differences between storage time (day) in the same columns ( $p \leq 0.05$ ). Different uppercase letters (A, B, C) indicate significant differences between temperature ( $^{\circ}\text{C}$ ) in the same rows ( $p \leq 0.05$ ).

**Table S21.** Effect of storage temperature on the count of yeast and mold of mango fruits.

| Temperature ( $^{\circ}\text{C}$ ) | coating | log (CFU/g fruit)   |                      |                     |                     |                     |                     |                        |                    |                    |
|------------------------------------|---------|---------------------|----------------------|---------------------|---------------------|---------------------|---------------------|------------------------|--------------------|--------------------|
|                                    |         | Storage time (days) |                      |                     |                     |                     |                     |                        |                    |                    |
|                                    |         | 0                   | 3                    | 6                   | 9                   | 12                  | 15                  | 18                     | 21                 | 24                 |
| 17                                 | uncoat- | 0.7 <sup>aA</sup> ± | 1.6 <sup>bB</sup> ±  | 3.0 <sup>dC</sup> ± | 4.9 <sup>dD</sup> ± | 6.1 <sup>dE</sup> ± | 7.4 <sup>cF</sup> ± |                        |                    |                    |
|                                    | ing     | 0.1                 | 0.3                  | 0.2                 | 0.3                 | 0.4                 | 0.4                 |                        |                    |                    |
|                                    | coating | 0.7 <sup>aA</sup> ± | 0.8 <sup>aAB</sup> ± | 1.0 <sup>aB</sup> ± | 1.5 <sup>aC</sup> ± | 1.9 <sup>aD</sup> ± | 2.3 <sup>aE</sup> ± | 2.8 <sup>F</sup> ± 0.1 | 3.1 <sup>G</sup> ± | 3.7 <sup>H</sup> ± |
|                                    |         | 0.1                 | 0.1                  | 0.1                 | 0.1                 | 0.2                 | 0.1                 |                        | 0.2                | 0.2                |
| 25                                 | uncoat- | 0.7 <sup>aA</sup> ± | 2.4 <sup>cB</sup> ±  | 5.9 <sup>eC</sup> ± | 7.6 <sup>eD</sup> ± |                     |                     |                        |                    |                    |
|                                    | ing     | 0.1                 | 0.1                  | 0.3                 | 0.6                 |                     |                     |                        |                    |                    |
|                                    | coating | 0.7 <sup>aA</sup> ± | 1.0 <sup>aB</sup> ±  | 1.9 <sup>bC</sup> ± | 2.4 <sup>bD</sup> ± | 2.8 <sup>bE</sup> ± | 3.6 <sup>bF</sup> ± |                        |                    |                    |
|                                    |         | 0.1                 | 0.1                  | 0.1                 | 0.1                 | 0.1                 | 0.2                 |                        |                    |                    |
| 32                                 | uncoat- | 0.7 <sup>aA</sup> ± | 3.9 <sup>dB</sup> ±  | 6.6 <sup>fC</sup> ± | 8.6 <sup>fD</sup> ± |                     |                     |                        |                    |                    |
|                                    | ing     | 0.1                 | 0.3                  | 0.4                 | 0.3                 |                     |                     |                        |                    |                    |
|                                    | coating | 0.7 <sup>aA</sup> ± | 1.9 <sup>bB</sup> ±  | 2.5 <sup>cC</sup> ± | 3.9 <sup>cD</sup> ± | 4.6 <sup>cE</sup> ± |                     |                        |                    |                    |
|                                    |         | 0.1                 | 0.3                  | 0.3                 | 0.2                 | 0.2                 |                     |                        |                    |                    |

Note: Different lowercase letters (a, b, c) indicate significant differences between storage time (day) in the same columns ( $p \leq 0.05$ ). Different uppercase letters (A, B, C) indicate significant differences between temperature ( $^{\circ}\text{C}$ ) in the same rows ( $p \leq 0.05$ ).

**Table S22.** Effect of storage temperature on TSS of mango fruits.

| Temperature ( $^{\circ}\text{C}$ ) | coating | TSS                 |                      |                        |                      |                      |                      |                     |                     |                     |
|------------------------------------|---------|---------------------|----------------------|------------------------|----------------------|----------------------|----------------------|---------------------|---------------------|---------------------|
|                                    |         | Storage time (days) |                      |                        |                      |                      |                      |                     |                     |                     |
|                                    |         | 0                   | 3                    | 6                      | 9                    | 12                   | 15                   | 18                  | 21                  | 24                  |
| 17                                 | uncoat- | 4.7 <sup>aA</sup> ± | 6.4 <sup>bB</sup> ±  | 9.1 <sup>bC</sup> ±    | 12.4 <sup>bD</sup> ± | 17.5 <sup>bE</sup> ± | 16.4 <sup>bF</sup> ± |                     |                     |                     |
|                                    | ing     | 0.2                 | 0.3                  | 0.4                    | 0.3                  | 0.6                  | 0.4                  |                     |                     |                     |
|                                    | coating | 4.7 <sup>aA</sup> ± | 5.1 <sup>aA</sup> ±  | 7.1 <sup>a</sup> ± 0.3 | 8.7 <sup>aC</sup> ±  | 10.3 <sup>aD</sup> ± | 12.5 <sup>aE</sup> ± | 15.6 <sup>H</sup> ± | 17.9 <sup>G</sup> ± | 19.5 <sup>H</sup> ± |
|                                    |         | 0.2                 | 0.3                  |                        | 0.6                  | 0.3                  | 0.3                  | 0.4                 | 0.5                 | 0.6                 |
| 25                                 | uncoat- | 4.7 <sup>aA</sup> ± | 13.0 <sup>dB</sup> ± | 17.1 <sup>dD</sup> ±   | 15.7 <sup>cC</sup> ± |                      |                      |                     |                     |                     |
|                                    | ing     | 0.2                 | 0.5                  | 0.5                    | 0.4                  |                      |                      |                     |                     |                     |
|                                    | coating | 4.7 <sup>aA</sup> ± | 5.6 <sup>abB</sup> ± | 10.2 <sup>cC</sup> ±   | 17.1 <sup>dD</sup> ± | 18.2 <sup>bE</sup> ± | 20.1 <sup>cF</sup> ± |                     |                     |                     |
|                                    |         | 0.2                 | 0.2                  | 0.4                    | 0.5                  | 0.7                  | 0.7                  |                     |                     |                     |
| 32                                 | uncoat- | 4.7 <sup>aA</sup> ± | 17.0 <sup>eB</sup> ± | 19.5 <sup>eC</sup> ±   | 17.5 <sup>dB</sup> ± |                      |                      |                     |                     |                     |
|                                    | ing     | 0.2                 | 0.8                  | 0.7                    | 0.7                  |                      |                      |                     |                     |                     |
|                                    | coating | 4.7 <sup>aA</sup> ± | 7.2 <sup>cB</sup> ±  | 10.4 <sup>cC</sup> ±   | 14.8 <sup>cD</sup> ± | 20.1 <sup>cE</sup> ± |                      |                     |                     |                     |
|                                    |         | 0.2                 | 0.4                  | 0.4                    | 0.5                  | 0.7                  |                      |                     |                     |                     |

Note: Different lowercase letters (a, b, c) indicate significant differences between storage time (day) in the same columns ( $p \leq 0.05$ ). Different uppercase letters (A, B, C) indicate significant differences between temperature ( $^{\circ}\text{C}$ ) in the same rows ( $p \leq 0.05$ ).

**Table S23.** Effect of storage temperature on TA of mango fruits.

| Temper-<br>ature<br>(°C) | coating        | Storage time (days)       |                           |                            |                            |                            |                            |                           |                           |                          |
|--------------------------|----------------|---------------------------|---------------------------|----------------------------|----------------------------|----------------------------|----------------------------|---------------------------|---------------------------|--------------------------|
|                          |                | 0                         | 3                         | 6                          | 9                          | 12                         | 15                         | 18                        | 21                        | 24                       |
| 17                       | uncoat-<br>ing | 0.85 <sup>aD</sup> ± 0.04 | 0.83 <sup>bD</sup> ± 0.04 | 0.70 <sup>cC</sup> ± 0.03  | 0.54 <sup>cB</sup> ± 0.02  | 0.50 <sup>aB</sup> ± 0.03  | 0.42 <sup>aA</sup> ± 0.02  |                           |                           |                          |
|                          | coating        | 0.85 <sup>aG</sup> ± 0.04 | 0.84 <sup>bG</sup> ± 0.04 | 0.80 <sup>eFG</sup> ± 0.03 | 0.76 <sup>eEF</sup> ± 0.03 | 0.71 <sup>cDE</sup> ± 0.03 | 0.68 <sup>cCD</sup> ± 0.03 | 0.65 <sup>BC</sup> ± 0.03 | 0.61 <sup>AB</sup> ± 0.03 | 0.58 <sup>A</sup> ± 0.02 |
| 25                       | uncoat-<br>ing | 0.85 <sup>aC</sup> ± 0.04 | 0.80 <sup>bC</sup> ± 0.04 | 0.65 <sup>bB</sup> ± 0.03  | 0.45 <sup>bA</sup> ± 0.02  |                            |                            |                           |                           |                          |
|                          | coating        | 0.85 <sup>aD</sup> ± 0.04 | 0.83 <sup>bD</sup> ± 0.03 | 0.75 <sup>dC</sup> ± 0.03  | 0.70 <sup>dB</sup> ± 0.03  | 0.60 <sup>bA</sup> ± 0.02  | 0.56 <sup>bA</sup> ± 0.03  |                           |                           |                          |
| 32                       | uncoat-<br>ing | 0.85 <sup>aD</sup> ± 0.04 | 0.63 <sup>aC</sup> ± 0.02 | 0.49 <sup>aB</sup> ± 0.02  | 0.38 <sup>aA</sup> ± 0.02  |                            |                            |                           |                           |                          |
|                          | coating        | 0.85 <sup>aC</sup> ± 0.04 | 0.80 <sup>bC</sup> ± 0.03 | 0.72 <sup>cdB</sup> ± 0.03 | 0.67 <sup>dB</sup> ± 0.03  | 0.52 <sup>aA</sup> ± 0.02  |                            |                           |                           |                          |

Note: Different lowercase letters (a, b, c) indicate significant differences between storage time (day) in the same columns ( $p \leq 0.05$ ). Different uppercase letters (A, B, C) indicate significant differences between temperature (°C) in the same rows ( $p \leq 0.05$ ).

**Table S24.** Effect of storage temperature on vitamin C of mango fruits.

| Temper-<br>ature<br>(°C) | coat-<br>ing   | vitamin C                   |                              |                              |                              |                              |                              |                             |                             |                            |
|--------------------------|----------------|-----------------------------|------------------------------|------------------------------|------------------------------|------------------------------|------------------------------|-----------------------------|-----------------------------|----------------------------|
|                          |                | Storage time (days)         |                              |                              |                              |                              |                              |                             |                             |                            |
|                          |                | 0                           | 3                            | 6                            | 9                            | 12                           | 15                           | 18                          | 21                          | 24                         |
| 17                       | un-<br>coating | 0.045 <sup>aE</sup> ± 0.002 | 0.043 <sup>cE</sup> ± 0.002  | 0.039 <sup>cD</sup> ± 0.002  | 0.030 <sup>cC</sup> ± 0.001  | 0.018 <sup>aB</sup> ± 0.001  | 0.011 <sup>aA</sup> ± 0.001  |                             |                             |                            |
|                          | coating        | 0.045 <sup>aF</sup> ± 0.002 | 0.044 <sup>cF</sup> ± 0.001  | 0.044 <sup>dF</sup> ± 0.003  | 0.042 <sup>dEF</sup> ± 0.003 | 0.040 <sup>cDE</sup> ± 0.003 | 0.037 <sup>bCD</sup> ± 0.002 | 0.035 <sup>BC</sup> ± 0.002 | 0.033 <sup>AB</sup> ± 0.001 | 0.030 <sup>A</sup> ± 0.002 |
| 25                       | un-<br>coating | 0.045 <sup>aD</sup> ± 0.002 | 0.040 <sup>bC</sup> ± 0.002  | 0.035 <sup>bB</sup> ± 0.001  | 0.020 <sup>bA</sup> ± 0.001  |                              |                              |                             |                             |                            |
|                          | coating        | 0.045 <sup>aD</sup> ± 0.002 | 0.043 <sup>cCD</sup> ± 0.001 | 0.043 <sup>dCD</sup> ± 0.002 | 0.040 <sup>dBC</sup> ± 0.002 | 0.038 <sup>cAB</sup> ± 0.002 | 0.035 <sup>bA</sup> ± 0.002  |                             |                             |                            |
| 32                       | un-<br>coating | 0.045 <sup>aD</sup> ± 0.002 | 0.032 <sup>aC</sup> ± 0.001  | 0.015 <sup>aB</sup> ± 0.001  | 0.008 <sup>aA</sup> ± 0.002  |                              |                              |                             |                             |                            |
|                          | coating        | 0.045 <sup>aC</sup> ± 0.002 | 0.040 <sup>bC</sup> ± 0.002  | 0.037 <sup>bcC</sup> ± 0.002 | 0.033 <sup>cA</sup> ± 0.002  | 0.030 <sup>bA</sup> ± 0.002  |                              |                             |                             |                            |

Note: Different lowercase letters (a, b, c) indicate significant differences between storage time (day) in the same columns ( $p \leq 0.05$ ). Different uppercase letters (A, B, C) indicate significant differences between temperature (°C) in the same rows ( $p \leq 0.05$ ).
